# Supplementary material for: PD-1 does not mark tumor-infiltrating CD8+ T cell dysfunction in human gastric cancer
Source: PubMed Central journal article supplement — J Immunother Cancer. 2020 Aug 4;8(2):e000422. doi: 10.1136/jitc-2019-000422 (PMC7406116; doi:10.1136/jitc-2019-000422), 2020-08-04
Supplement: jitc-2019-000422supp001.pdf [file jitc-2019-000422supp001.pdf]

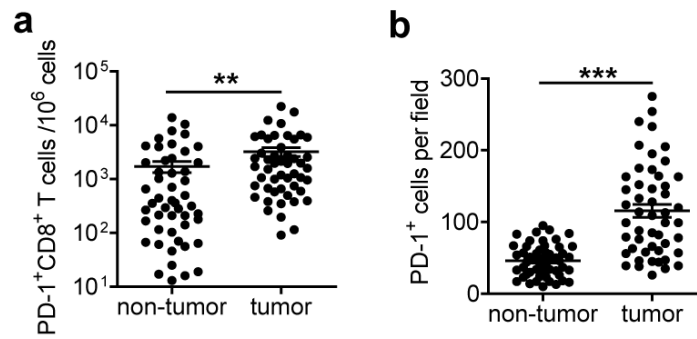

Supplemental Figure 1. PD-1<sup>+</sup> cell numbers in the non-tumor and tumor tissues of 50 GC patients. **a** The total number of PD-1<sup>+</sup>CD8<sup>+</sup> T cells per million cells was calculated in the non-tumor and tumor tissues of GC patients based on gated PD-1<sup>+</sup>CD8<sup>+</sup> cell percentages. **b** The number of PD-1<sup>+</sup> cells per field was statistically analyzed in the non-tumor and tumor tissues of GC patients based on immunohistochemical staining. \*\* $P < 0.01$ , \*\*\* $P < 0.001$ : Student's *t* test

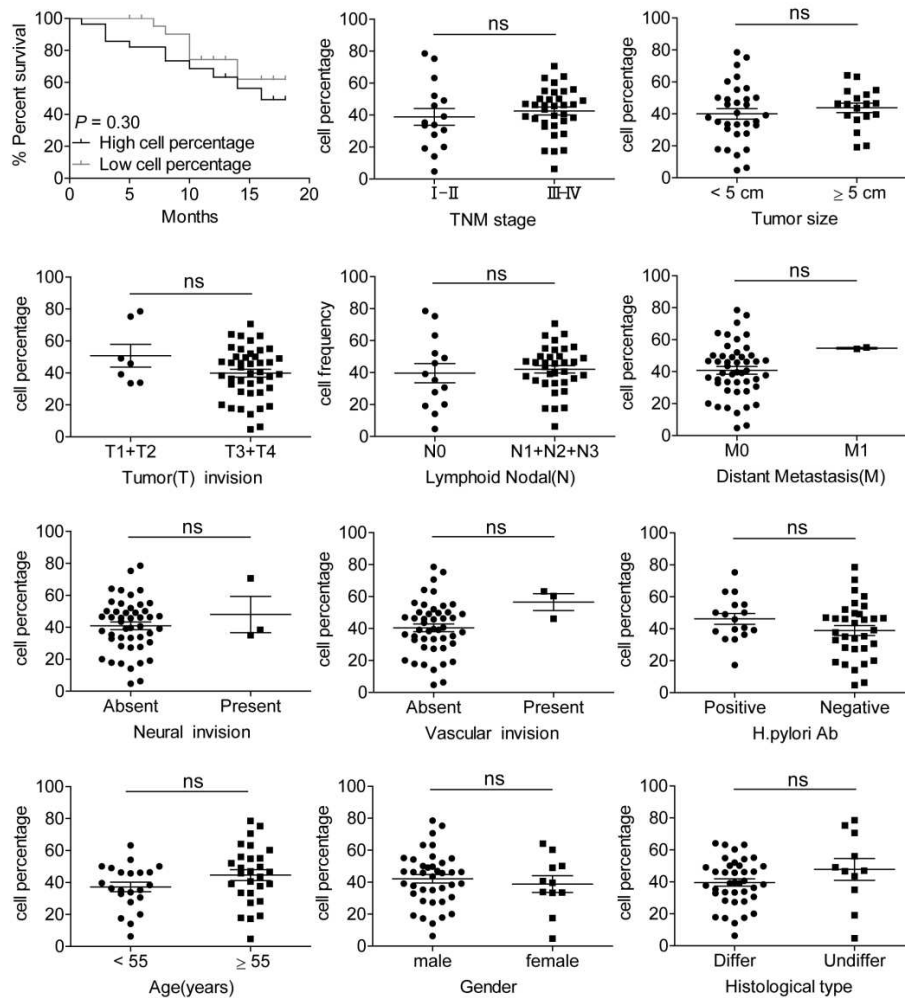

Supplemental Figure 2. Correlation analysis between the percentage of tumor-infiltrating PD-1<sup>+</sup>CD8<sup>+</sup> T cells and various clinical parameters of GC patients. For the cumulative survival curves, patients were separated into two groups by the median value of tumor-infiltrating PD-1<sup>+</sup>CD8<sup>+</sup> T cell percentages, and Kaplan–Meier plots were used to calculate cumulative survival differences. Each dot represents one patient. Ab, antibody; Diff, differentiated; Undiff, undifferentiated; ns, not significant.

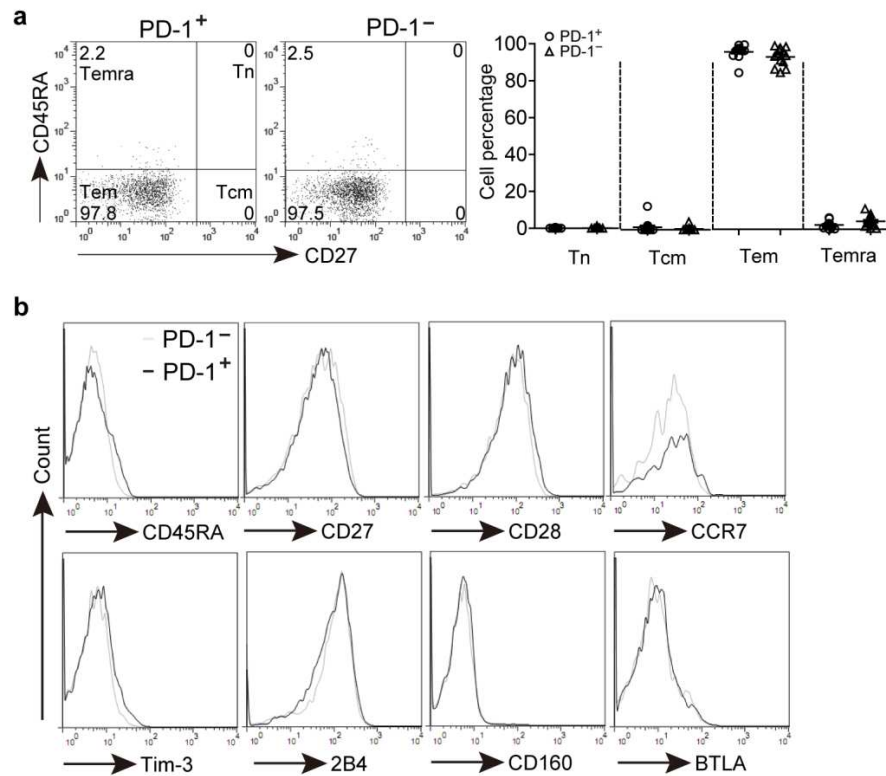

Supplemental Figure 3. Phenotypic features of GC-infiltrating PD-1<sup>+</sup>CD8<sup>+</sup> T cells. **a** Tumor tissue-derived cell suspensions were stained with CD3, CD8, PD-1, CD45RA and CD27 antibodies. A representative flow cytometry analysis from one sample and the percentages of different PD-1<sup>+</sup>CD8<sup>+</sup> versus PD-1<sup>-</sup>CD8<sup>+</sup> T cell groups indicated by CD45RA and CD27 expression are shown: Tn (CD45RA<sup>+</sup>CD27<sup>+</sup>), Tcm (CD45RA<sup>-</sup>CD27<sup>+</sup>), Tem (CD45RA<sup>-</sup>CD27<sup>-</sup>), and Temra (CD45RA<sup>+</sup>CD27<sup>-</sup>). **b** Tumor-derived cell suspensions were stained with CD3, CD8, PD-1, CD45, CD27, CD28, CCR7, Tim-3, 2B4, CD160 and BTLA antibodies. Cells were gated on PD-1<sup>+</sup>CD8<sup>+</sup> and PD-1<sup>-</sup>CD8<sup>+</sup> T cells, and the expression of CD45, CD27, CD28, CCR7, Tim-3, 2B4, CD160 and BTLA was analyzed.

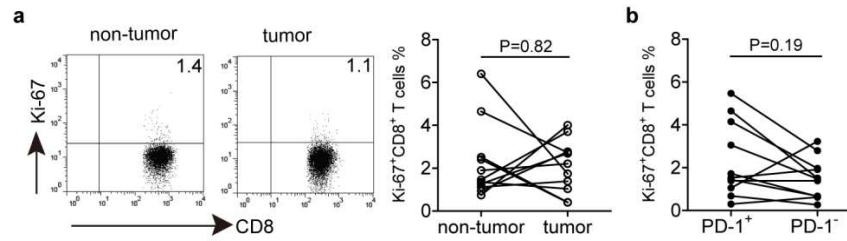

Supplemental Figure 4. The expression of proliferation-associated marker Ki-67 in PD-1<sup>+</sup>CD8<sup>+</sup> T cells in GC. Tumor and non-tumor tissue-derived cell suspensions were stained with CD3, CD8 and PD-1 antibodies, and then cells were fixed and permeabilized for 30 min using Foxp3-Staining Buffer Set (eBiosciences), following stained with a Ki-67 antibody for flow cytometric analysis. **a** Representative dot-plots and statistical analysis showing the percentages of Ki-67 expression among CD8<sup>+</sup> T cells from paired tumor and non-tumor tissues of 11 GC patients. **b** Statistical analysis of Ki-67<sup>+</sup> cell percentages on PD-1<sup>+</sup>CD8<sup>+</sup> versus PD-1<sup>-</sup>CD8<sup>+</sup> T cells in the tumor tissues of 11 GC patients.

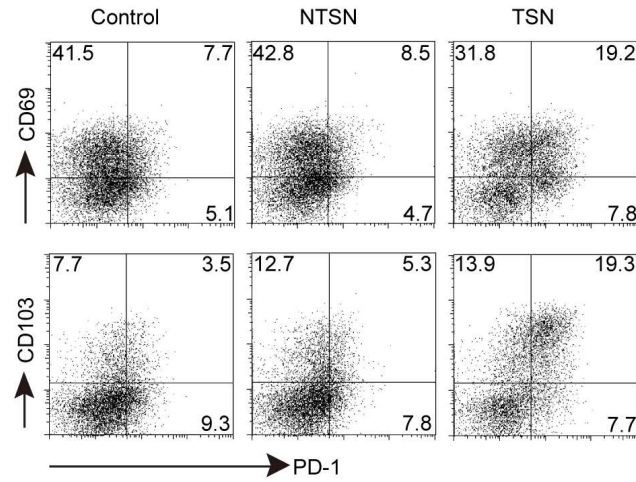

Supplemental Figure 5. GC-derived soluble factor(s) contribute to PD-1 expression of CD8<sup>+</sup> T cells. CD8<sup>+</sup> T cells were isolated and cultured with 30% TSN or NTSN for 72 hours, and then the levels of PD-1, CD69 and CD103 expression on these CD8<sup>+</sup> T cells were analyzed.

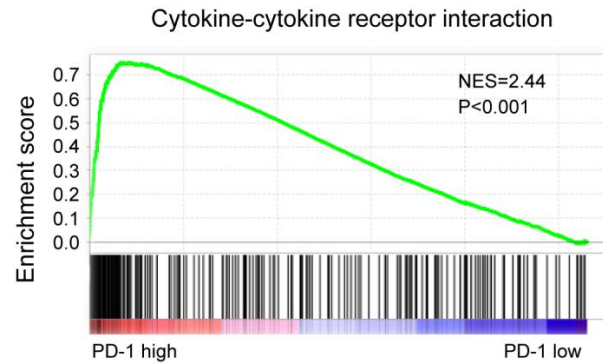

Supplemental Figure 6. Gene set enrichment analysis (GSEA) revealed an enrichment of cytokine-cytokine receptor interaction involved in PD-1<sup>high</sup> tumors. NES, non-enrichment score. GSEA performed by the Molecular Signature Database (MSigDB) was used to identify the pathways that might be significantly enriched in PD-1<sup>high</sup> tumor samples. If a gene set has a positive enrichment score and the majority of its members also have higher expression accompanied with higher risk score, the set is then termed 'enriched'.

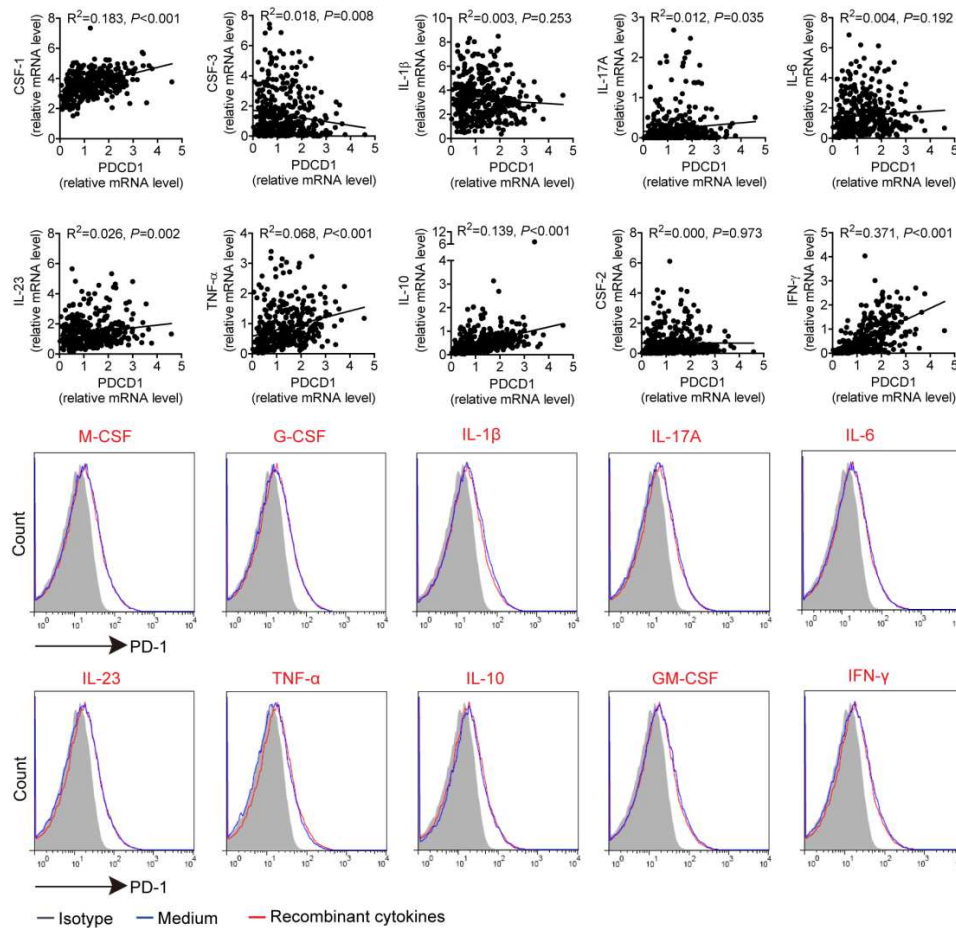

Supplemental Figure 7. The expression of PD-1 on CD8<sup>+</sup> T cells after stimulation. The dataset of gene expression profiles in GC patients were downloaded from the Cancer Genome Atlas (TCGA) data portal website (<https://tcga-data.nci.nih.gov/tcga/>). We obtained the normalized reads from 384 GC patients by summing up the raw counts, and then the correlation analysis between PD-1 transcript (PDCD1) level and CSF-1 (M-CSF transcript), CSF-3 (G-CSF transcript), IL-1 $\beta$ , IL-17A, IL-6, IL-23, TNF- $\alpha$ , IL-10, CSF-2 (GM-CSF transcript), and IFN- $\gamma$  mRNA level were performed in 384 GC patients from TCGA dataset. Blood CD8<sup>+</sup> T cells were purified and cultured for 72 hours with 10 ng/ml of individual recombinant human M-CSF, G-CSF, IL-1 $\beta$ , IL-17A, IL-6, IL-23, TNF- $\alpha$ , IL-10, GM-CSF, and IFN- $\gamma$  in the presence of anti-CD3 and anti-CD28 antibodies. A representative histogram of PD-1 expression on CD8<sup>+</sup> T cells by flow cytometry.

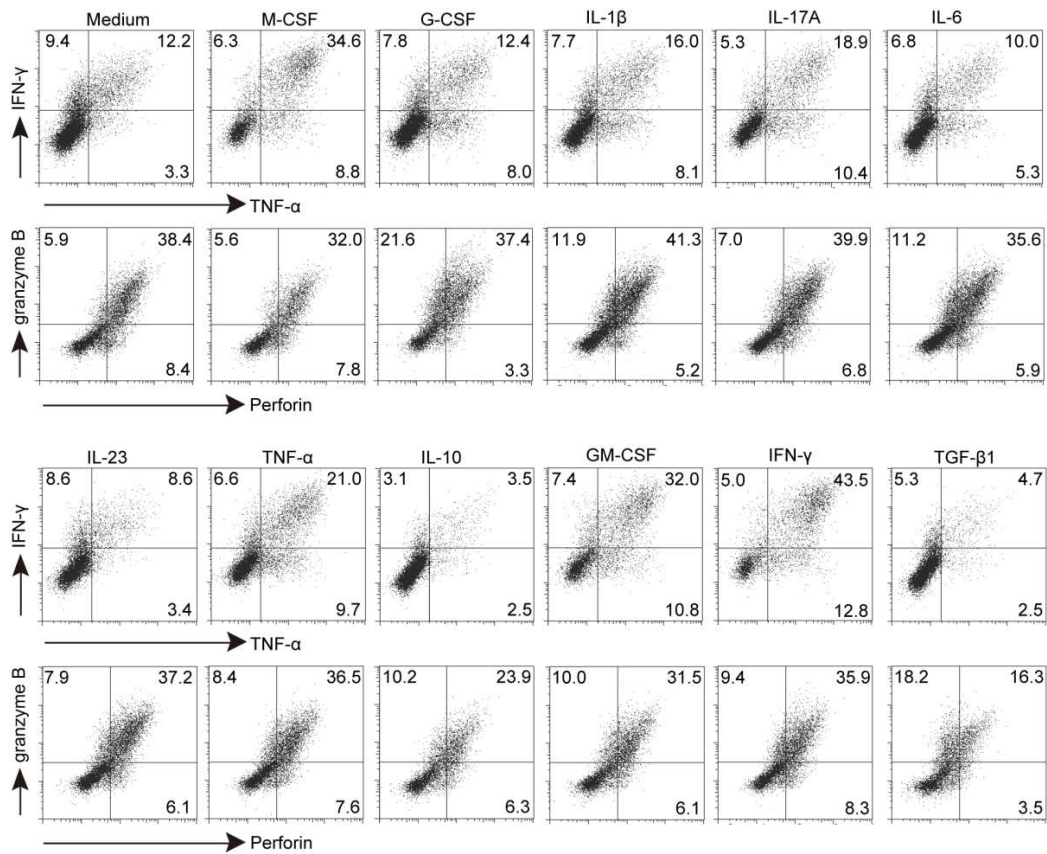

Supplemental Figure 8. The effector function of CD8<sup>+</sup> T cells after stimulation. Blood CD8<sup>+</sup> T cells were purified and cultured for 72 hours with 10 ng/ml of individual recombinant human M-CSF, G-CSF, IL-1β, IL-17A, IL-6, IL-23, TNF-α, IL-10, GM-CSF, IFN-γ and TGF-β1 in the presence of anti-CD3 and anti-CD28 antibodies. The expressions of INF-γ, TNF-α, granzyme B and perforin in these CD8<sup>+</sup> T cells were determined by flow cytometry.



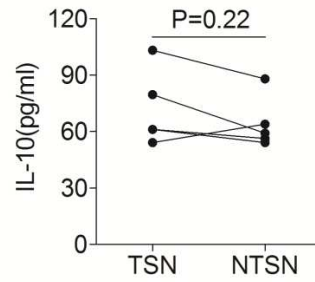

Supplemental Figure 9. The comparison of IL-10 levels between TSN and NTSN. TSN and NTSN obtained from 5 selected GC patients were detected by using IL-10 ELISA kits in accordance with the manufacturer's recommendations (Dakewei Biotech), and statistical analysis of the concentrations of IL-10 was performed between TSN and NTSN.

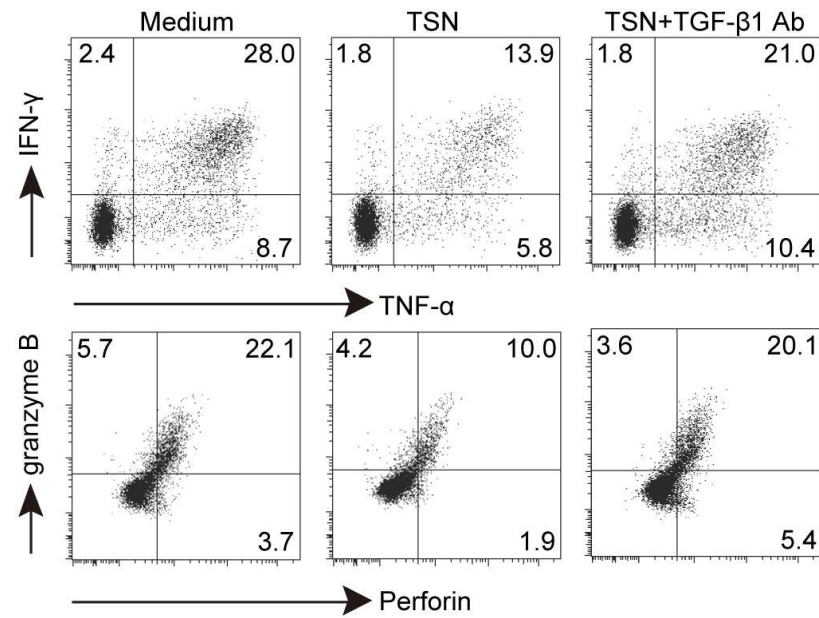

Supplemental Figure 10. TSN-induced CD8<sup>+</sup> T cell dysfunction was reversed by TGF-β1 blockade. TSN-treated CD8<sup>+</sup> T cells were cultured with or without a TGF-β1 blocking antibody for 72 hours in the presence of anti-CD3 and anti-CD28 antibodies. CD8<sup>+</sup> T cells producing INF-γ, TNF-α, granzyme B and perforin were determined by flow cytometry.

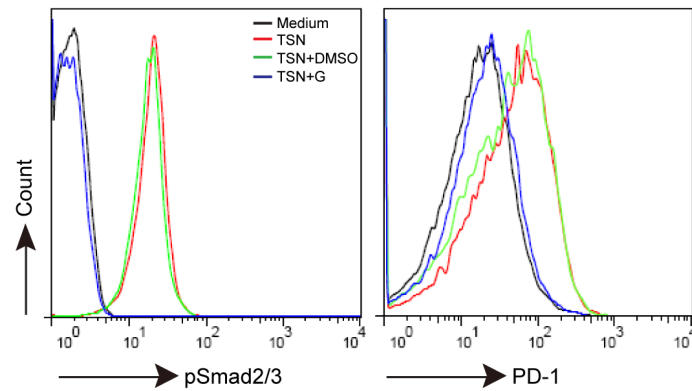

Supplemental Figure 11. TSN-induced Smad2/3 phosphorylation and PD-1 expression of CD8<sup>+</sup> T cells was blocked by a TGF- $\beta$ RI inhibitor. CD8<sup>+</sup> T cells were pretreated with or without DMSO or Galunisertib (G, a TGF- $\beta$ RI kinase inhibitor, 5  $\mu$ M) for 1 hour, and then cultured with 30% TSN in the presence of anti-CD3 and anti-CD28 antibodies, and the level of Smad2/3 phosphorylation and PD-1 expression of CD8<sup>+</sup> T cells were determined by flow cytometry.

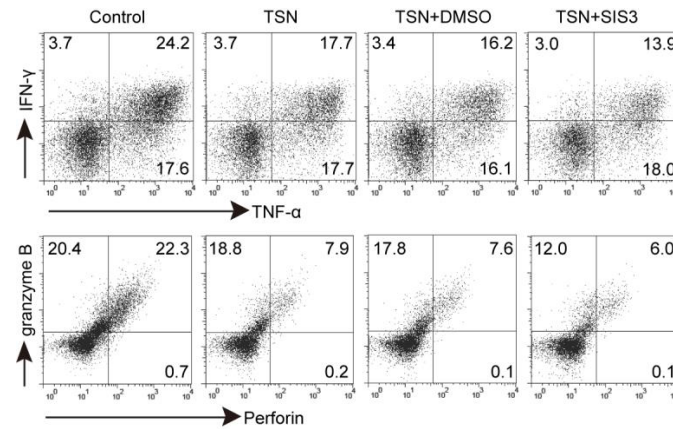

Supplemental Figure 12. GC-derived TGF- $\beta$ 1 mediated Smad3-independent CD8<sup>+</sup> T cell dysfunction. CD8<sup>+</sup> T cells were purified from PBMCs and pretreated with or without SIS3 or DMSO for 1 hour, and then exposed to 30% TSN for 72 hours in the presence of anti-CD3 and anti-CD28 antibodies. The expression of IFN- $\gamma$ , TNF- $\alpha$ , granzyme B and perforin of CD8<sup>+</sup> T cells were analyzed by flow cytometry in the Control group, TSN-treated group, TSN plus DMSO group and TSN plus SIS3 group.

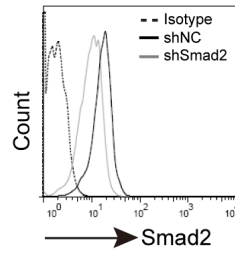

Supplemental Figure 13. The expression of Smad2 in CD8<sup>+</sup> T cells transduced with lentiviral particles. CD8<sup>+</sup> T cells purified from PBMCs were activated with pre-coated with anti-CD3 (2 µg/ml) and anti-CD28 (1 µg/ml) antibodies for 24 hours, and then lentiviral particles containing Smad2 shRNA (shSmad2, Santa Cruz Biotechnology) or control shRNA (shNC, Santa Cruz Biotechnology) were added. After 72 hours transduction, Cells were washed and fixed, permeabilized for 30 min using Foxp3-Staining Buffer Set (eBiosciences), following stained with Alexa Fluor<sup>®</sup> 488 conjugated anti-human Smad2 antibody (Santa Cruz Biotechnology) for flow cytometric analysis.

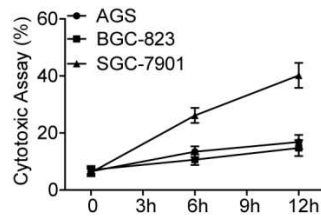

Supplemental Figure 14. The cytotoxicity effect of CD8<sup>+</sup> T cells on SGC-7901, AGS and BGC-823 cells. CD8<sup>+</sup> T cells activated *in vitro* were plated in 96-well plates with mitomycin C- (10 µg/ml, Sigma-Aldrich) treated gastric cancer cell lines SGC-7901, AGS or BGC-823 for different time (0, 6 and 12 hours), and the effector/target cell (E: T) ratio used was 10:1. Cytotoxicity was assayed by using the CytoTox 96<sup>®</sup> Non-Radioactive Cytotoxicity Assay (Promega) according to manufacturer's instructions.  $\text{Cytotoxicity}\% = (\text{Experimental-Effector Spontaneous-Target Spontaneous}) / (\text{Target Maximum-Target Spontaneous}) \times 100$ .

Supplemental Table 1. Clinical Characteristics of 50 GC Patients

| Variables                                                          | No. of patients |
|--------------------------------------------------------------------|-----------------|
| Sex (male/female)                                                  | 39/11           |
| Age (y), median (range)                                            | 55, 28-82       |
| <i>H pylori</i> antibody (positive/negative)                       | 17/33           |
| Tumor size (cm; <5/≥5)                                             | 32/18           |
| Histologic type (differentiated/undifferentiated)                  | 11/39           |
| Neural invasion (absent/present)                                   | 47/3            |
| Vascular invasion (absent/present)                                 | 47/3            |
| Tumor (T) invasion (T1+T2/T3+T4)                                   | 7/43            |
| Lymphoid nodal (N) status (N0 / N1+N2+N3)                          | 14/36           |
| Distant metastasis (M) status (M0/M1)                              | 58/2            |
| TNM stage (I+II/III+IV)                                            | 16/34           |
| PD <sup>+</sup> CD8 <sup>+</sup> T cell percentage (median, range) | 42.1, 4.7-78.5  |

Supplemental Table 2. Fluorochrome-conjugated antibodies used in flow cytometry

| Antibodies                                  | Source        | Clone           |
|---------------------------------------------|---------------|-----------------|
| Alexa Fluor 488 conjugated anti-human CD160 | eBioscience   | BY55            |
| APC-H7 conjugated anti-human CD3            | BD Pharmingen | SK7             |
| APC-conjugated anti-human PD-1              | Biolegend     | EH12.2H7        |
| FITC-conjugated anti-human CD45RA           | Biolegend     | HI100           |
| FITC-conjugated anti-human CD69             | Biolegend     | FN50            |
| FITC-conjugated anti-human CD62L            | Biolegend     | DREG-56         |
| FITC-conjugated anti-human CD160            | Biolegend     | DX22            |
| FITC-conjugated anti-human granzyme B       | Biolegend     | GB11            |
| FITC-conjugated anti-human IFN- $\gamma$    | Biolegend     | B27             |
| FITC-conjugated anti-human Eomes            | eBioscience   | WD1928          |
| PE-conjugated anti-human Perforin           | Biolegend     | dG9             |
| PE-conjugated anti-human CD103              | Biolegend     | Ber-ACT8        |
| PE-conjugated anti-human CD25               | Biolegend     | BC96            |
| PE-conjugated anti-human PD-1               | Biolegend     | EH12.2H7        |
| PE-conjugated anti-human Tim-3              | Biolegend     | F38-2E2         |
| PE-conjugated anti-human BTLA               | Biolegend     | MIH26           |
| PE-conjugated anti-human 2B4                | Biolegend     | C1.7            |
| PE-conjugated anti-human T-bet              | Biolegend     | eBio4B10 (4B10) |
| PE-conjugated anti-human TNF- $\alpha$      | Biolegend     | MAb11           |
| PE-Cy7-conjugated anti-human CD27           | Biolegend     | M-T271          |
| PE-Cy7-conjugated anti-human CD45           | Biolegend     | HI30            |
| PE-Cy7-conjugated anti-human CCR7           | Biolegend     | G043H7          |
| PE-Cy7-conjugated anti-human CD28           | Biolegend     | CD28.2          |
| PE-Cy7-conjugated anti-human IFN- $\gamma$  | Biolegend     | A019D5          |
| PerCP-Cy5.5-conjugated anti-human CD8       | Biolegend     | RPA-T8          |
